# Supplementary material
Source: Springer Nature journal article supplement (https://www.springermedizin.de/resource/supplementary/12882_2014_840_MOESM5_ESM.pdf/9454426)
Supplement: MOESM5 [file 9454426]

# Effect of Vagotomy on the Cold Pressor Test

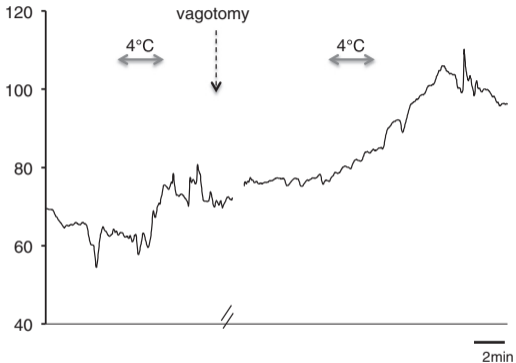

Cold stimulation of the tail ;  
1. placed cold water (4°C) for 2min  
2. 30min interval

General  
1. Adult rat (SD Male 400g)  
2. Urethane anesthesia (1.2g/kg)  
3. Body temperature ; 38°C  
4. MAP monitor; right femoral artery
